# Supplementary material
Source: HighWire-hosted journal article supplement (https://erj.ersjournals.com/content/54/5/1900960)
Supplement: inline-supplementary-material-1 [file inline-supplementary-material-1.pdf]

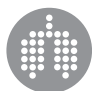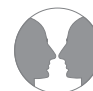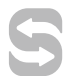

SHAREABLE PDF

# The association between cadmium exposure and chronic airflow limitation and emphysema: the Swedish CARDioPulmonary BioImage Study (SCAPIS pilot)

Kjell Torén<sup>1</sup>, Anna-Carin Olin<sup>1</sup>, Åse Johnsson<sup>2</sup>, Jenny Vikgren<sup>2</sup>,  
Niklas Forsgård<sup>3</sup>, Göran Bergström<sup>4</sup>, Gerd Sallsten<sup>1</sup> and Lars Barregård<sup>1</sup>

**Affiliations:** <sup>1</sup>Section of Occupational and Environmental Medicine, Dept of Public Health and Community Medicine, Sahlgrenska Academy, University of Gothenburg, Gothenburg, Sweden. <sup>2</sup>Dept of Radiology, Institute of Clinical Sciences, Sahlgrenska Academy, University of Gothenburg, Gothenburg, Sweden. <sup>3</sup>Dept of Clinical Chemistry, Sahlgrenska University Hospital, Gothenburg, Sweden. <sup>4</sup>Dept of Molecular and Clinical Medicine, Institute of Medicine, Sahlgrenska Academy, University of Gothenburg, Gothenburg, Sweden.

**Correspondence:** Kjell Torén, Section of Occupational and Environmental Medicine, Department of Public Health and Community Medicine, Sahlgrenska Academy, University of Gothenburg, Box 414, S-405 30 Gothenburg, Sweden. E-mail: [kjell.toren@amm.gu.se](mailto:kjell.toren@amm.gu.se)

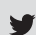

@ERSpublications

**In this general population sample with detailed control for smoking habits there is an association between blood cadmium and emphysema based on lung computed tomography** <http://bit.ly/2K9S39J>

**Cite this article as:** Torén K, Olin A-C, Johnsson Å, *et al.* The association between cadmium exposure and chronic airflow limitation and emphysema: the Swedish CARDioPulmonary BioImage Study (SCAPIS pilot). *Eur Respir J* 2019; 54: 1900960 [<https://doi.org/10.1183/13993003.00960-2019>].

This single-page version can be shared freely online.

## To the Editor:

Cadmium is a metal that is widely spread in the environment and human populations are exposed to it through food, mainly grains and vegetables. The tobacco plants accumulate cadmium, and tobacco smokers accumulate the cadmium in tobacco smoke, which is absorbed in the lungs [1]. Occupational exposure to cadmium has been linked to the development of emphysema and impaired lung function [2, 3]. Increased levels of blood cadmium (B-Cd) or urinary cadmium are associated with lower lung function, and it has been suggested that cadmium, in the low-dose interval, is a risk factor for impaired lung function [1, 4].
